1 **MicroRNA clusters integrate evolutionary constraints on expression and target**  
2 **affinities: the miR-6/5/4/286/3/309 cluster in *Drosophila* leg development**

3

4 Zhe Qu<sup>1,^</sup>, Wing Chung Yiu<sup>1,^</sup>, Ho Yin Yip<sup>1,^</sup>, Wenyan Nong<sup>1,^</sup>, Clare W.C. Yu<sup>1</sup>, Ivy  
5 H.T. Lee<sup>1</sup>, Annette Y.P. Wong<sup>1</sup>, Nicola W.Y. Wong<sup>1</sup>, Fiona K.M. Cheung<sup>1</sup>, Ting Fung  
6 Chan<sup>2</sup>, Kwok Fai Lau<sup>3</sup>, Silin Zhong<sup>2</sup>, Ka Hou Chu<sup>4</sup>, Stephen S. Tobe<sup>5</sup>, David E.K.  
7 Ferrier<sup>6</sup>, William G. Bendena<sup>8</sup>, Jerome H.L. Hui<sup>1,\*</sup>

8

9 <sup>1</sup> School of Life Sciences, Simon F.S. Li Marine Science Laboratory, State Key  
10 Laboratory of Agrobiotechnology, The Chinese University of Hong Kong

11 <sup>2</sup> School of Life Sciences, State Key Laboratory of Agrobiotechnology, The Chinese  
12 University of Hong Kong

13 <sup>3</sup> School of Life Sciences, The Chinese University of Hong Kong

14 <sup>4</sup> School of Life Sciences, Simon F.S. Li Marine Science Laboratory, The Chinese  
15 University of Hong Kong

16 <sup>5</sup> Department of Cell and Systems Biology, University of Toronto, Canada

17 <sup>6</sup> School of Biology, University of St. Andrews, United Kingdom

18 <sup>7</sup> Department of Biology, Queen's University, Canada

19

20 <sup>^</sup>co-first authors, Correspondence: [jeromehui@cuhk.edu.hk](mailto:jeromehui@cuhk.edu.hk)

21

22

23

24

25 **Abstract**

26 A striking feature of microRNAs is that they are often clustered in the genomes of  
27 animals. The functional and evolutionary consequences of this clustering remain  
28 obscure. Here, we investigated a microRNA cluster miR-6/5/4/286/3/309 that is  
29 conserved across drosophilid lineages. Small RNA sequencing revealed expression of  
30 this microRNA cluster in *Drosophila melanogaster* leg discs, and conditional  
31 overexpression of the whole cluster resulted in leg appendage shortening. Transgenic  
32 overexpression lines expressing different combinations of microRNA cluster members  
33 were also constructed. Expression of individual microRNAs from the cluster resulted  
34 in a normal wild-type phenotype, but either the expression of several ancient  
35 microRNAs together (miR-5/4/286/3/309) or more recently evolved clustered  
36 microRNAs (miR-6-1/2/3) can recapitulate the phenotypes generated by the whole-  
37 cluster overexpression. Screening of transgenic fly lines revealed down-regulation of  
38 leg patterning gene cassettes in generation of the leg-shortening phenotype.  
39 Furthermore, cell transfection with different combinations of microRNA cluster  
40 members revealed a suite of downstream genes targeted by all cluster members, as well  
41 as complements of targets that are unique for distinct microRNAs. Considering together  
42 the microRNA targets and the evolutionary ages of each microRNA in the cluster  
43 demonstrates the importance of microRNA clustering, where new members can  
44 reinforce and modify the selection forces on both the cluster regulation and the gene  
45 regulatory network of existing microRNAs.

46

47

48

49

## 50 **Introduction**

51 Operation of genes within multigenic clusters is widespread, but the functional and  
52 evolutionary implications of this are often poorly understood. In microbes, the poly-  
53 cistronic transcription of operons and anti-phage defensive system are well known for  
54 their importance (Doron et al 2018). In animals, there are various examples of protein-  
55 coding genes that are regulated within clusters. For example, homeobox genes in the  
56 Hox cluster are regulated through multigenic regulatory elements (Deschamps and  
57 Duboule 2017). In addition to these cases of clustered protein-coding genes, non-  
58 protein encoding genes such as those producing microRNAs are also often found to be  
59 in co-regulated clusters (e.g. Altuvia et al 2005; Fromm et al 2015; Lagos-Quintana et  
60 al 2001; Mohammed et al 2014; Bartel 2018). For instance, synchronised expression of  
61 clustered microRNAs in normal human cells is found to be mis-regulated during disease  
62 development (Dambal et al 2015; Nojima et al 2016), and mis-regulation has been  
63 implicated in cancer formation (Ventura et al 2008; Kim et al 2009). Since these  
64 microRNA clusters are relatively recent discoveries compared to protein-coding gene  
65 clusters, much less is known about the range of functional consequences of this  
66 clustering and the resultant evolutionary impacts.

67

68 There is an important difference between protein-coding versus microRNA gene  
69 clusters in animals. The individual genes in protein-coding gene clusters tend to have  
70 their own promoters, whereas microRNA clusters are often comprised of members  
71 transcribed as a single unit or polycistronic transcript regulated by a single promoter  
72 (Kozomara and Griffiths-Jones 2014). In addition, microRNA genes in a cluster are  
73 sometimes found to be conserved in sequence and orientation (e.g. the miR-17 cluster  
74 in mammals, Tanzer and Stadler 2004). This could be a consequence of *de novo*  
75 formation of hairpins in existing microRNA transcripts potentially being the major

76 mechanism giving rise to new cluster members (Marco et al 2013; Wang et al 2016).  
77 Also, microRNAs in the same cluster are proposed to possess similar targeting  
78 properties or regulate genes in the same pathway (e.g. Kim and Nam 2006; Yuan et al  
79 2009; Wang et al 2011; Hausser and Zavolan 2014; Wang et al 2016), although this  
80 remains somewhat controversial (e.g. Marco 2019; Wang et al 2019). In fact, the range  
81 of functional and evolutionary implications of polycistronic microRNAs in general  
82 remains controversial with regards to whether they are non-adaptive, the by-product of  
83 a tight genomic linkage, or simply expressed together due to unknown functional  
84 constraints (e.g. Marco et al 2013). A fundamental issue in these controversies is that  
85 most of these studies rely on correlating expression of the cluster with *in silico*  
86 prediction of their target genes. Systematic dissection of the functions of individual  
87 microRNAs from a cluster versus the function of the cluster as a whole remains to be  
88 tested.

89

## 90 **Results and Discussion**

91 The miR-309-6 microRNA cluster has a distinctive composition/ organization of miR-  
92 6/5/4/286/3/309 in drosophilids that is conserved across the genus (Fig. 1A,  
93 Supplementary data S1). The miR-309-6 cluster contains different microRNA family  
94 members with different origins, such as miR-309 and miR-3 belong to MiR-3 family  
95 that originated in the Pancrustacea, miR-286 is in the Protostomia conserved MIR-279  
96 family and miR-4 belongs to the most ancient MIR-9 family (Fromm et al 2019;  
97 Mohammed et al 2014; Ninova et al 2014). The cluster is located between genes  
98 CG15125 and CG11018, and is processed from a single ~1.5kb transcript in *Drosophila*  
99 *melanogaster* (Biemar et al 2005). It has high expression levels in early embryos  
100 (Ninova et al 2014) and deletion of the cluster results in partial larval lethality (Bushati  
101 et al 2008; Chen et al 2014). To identify the targets that are being regulated by miR-

102 309-6 clusters in different drosophilids, *in silico* prediction of the microRNA targets of  
103 individual members of the cluster were carried out using miRanda and Targetscan  
104 (Supplementary data S2). In *D. melanogaster*, 37-38% of the total target genes were  
105 shared between at least 2 microRNAs in the cluster (Fig. 1B). In other drosophilid  
106 species, excluding the numbers predicted in *D. willistoni* because these are based on  
107 only a small number of available transcriptomes, 12.59%-22.77% of targets were  
108 shared between at least 2 microRNAs (Supplementary data S2). This is in agreement  
109 with previous data that suggested that microRNAs within a cluster may share common  
110 target genes (e.g. Kim and Nam 2006; Yuan et al 2009; Wang et al 2011; Hausser and  
111 Zavolan 2014; Wang et al 2016).

112

113 As bioinformatic predictions of microRNA targets are prone to inclusion of false  
114 positives (e.g. Pinzon et al 2017), functional investigation was undertaken. Loss-of-  
115 function of the whole cluster was reported to result in larval lethality at different larval  
116 stages with about 57%-80% offspring survived to adulthood that were viable and fertile  
117 (Bushati et al 2008; Chen et al 2014), and in our hands this whole-cluster deletion line  
118 also resulted in partial larval lethality as previously reported and around 50% larvae  
119 survived to adults. Previous studies mainly focused on the functional importance of this  
120 microRNA cluster in embryonic stages (i.e. during the maternal-to-zygotic transition),  
121 and there is limited information on its function in other developmental stages or tissues  
122 (e.g. misorientation of adult sensory bristles on the adult notum with miR-3/-309  
123 overexpression, Zhou et al 2018). We examined microRNA expression level/ pattern  
124 of this cluster in MirGeneDB and analysed the small RNA data sets of ModENCODE  
125 (Supplementary data S3), confirming that members of miR-309-6 cluster are expressing  
126 in various developmental stages/tissues. To facilitate further analyses in late  
127 development we sequenced the small RNA contents of leg discs in *D. melanogaster* L3

128 larvae, and revealed the expression of mature microRNAs contained in this cluster (Fig.  
129 2). This finding was further validated by Taqman microRNA assays (Supplementary  
130 data S3), implying their potential functional roles during *D. melanogaster* leg  
131 development. The expression levels of miR-309 and miR-3 are lower than other  
132 members contained in the cluster, which is consistent with a recent study showing faster  
133 degradation rates of miR-309 and -3 (Zhou et al 2018).

134

135 To enable functional analyses in late development we generated two homozygous UAS-  
136 miR-309-6 cluster lines, with the whole cluster independently inserted at 3L:3714826  
137 (5'end of CG32264, named UAS-miR-309-6-I) and 3R:25235447 (5'end of CG10420,  
138 named UAS-miR-309-6-II). The location and orientation of these insertions was  
139 confirmed by Splinkerette PCR.

140

141 We screened for phenotypes by crossing UAS-miR-309-6-I and UAS-miR-309-6-II  
142 with GAL4 lines that targeted different tissues. Crossing UAS lines to either GAL4-*Dll*  
143 or GAL4-*ptc*, which targets *Distal-less* or *patched* expressing cells in the leg and wing  
144 discs, resulted in shortening and deletion of leg tarsal segments (Fig. 3B-C) relative to  
145 control animals (Fig. 3A-C, Supplementary information S4). Loss of the wing anterior  
146 cross-vein was also observed in these animals (Fig.3P-Q). Flies with shortened leg  
147 segments due to overexpression of the whole microRNA cluster were fertile and able  
148 to mate. Nevertheless, the mobility of both males and females was reduced. Moreover,  
149 during courtship, more effort was required for males and females to copulate, and the  
150 penetration time was dramatically reduced compared to wild type.

151

152 To dissect if select microRNAs in the cluster were responsible for the altered leg  
153 phenotypes we generated homozygous UAS lines with subsets of members of the

154 cluster; *-miR-309/3/286/4/5* (UAS-*miR-309-5*), UAS-*miR-286/4/5* and UAS-*miR-6-*  
155 *1/6-2/6-3*. Also, UAS lines were generated that expressed individual cluster members;  
156 UAS-*miR-309*, UAS-*miR-3* and UAS-*miR-286*. All lines were crossed with GAL4-*Dll*  
157 or GAL4-*ptc* drivers. Surprisingly, *Dll* or *ptc*-driven overexpression of either *miR-309-*  
158 *5* or *miR-6-1/6-2/6-3* (Fig. 3D, E, J and O, Supplementary information S4) recapitulated  
159 the phenotype created by overexpression of the entire cluster, while all other  
160 combinations showed normal leg phenotypes (Fig. 3 F-I and K-N). The number of tarsal  
161 segments were counted for different crosses, and only *Dll* or *ptc* driven overexpression  
162 of either *miR-309-5* or *miR-6-1/6-2/6-3* showed reduced tarsal segment numbers  
163 (Supplementary information S5). In addition to the aberrant tarsal segments, another  
164 phenotype of loss of the anterior wing cross vein was also observed in GAL4-*ptc*>*miR-*  
165 *309-6*, GAL4-*ptc*>*miR-309-5* and GAL4-*ptc*>*miR-6-1/6-2/6-3* flies (Fig. 3Q, R and W),  
166 but not with any of the other microRNA UAS lines (Fig. 3S-V). These data showed that  
167 the upregulation of either *miR-309-5* or *miR-6-1/6-2/6-3* partial clusters could cause the  
168 loss of tarsal segments and the anterior cross vein in a similar fashion to overexpression  
169 of the entire cluster.

170

171 UAS-microRNA-sponge lines that act as competitive inhibitors of the individual  
172 microRNAs including *miR-309*, *miR-3*, *miR-286*, *miR-4*, *miR-5* and *miR-6-1/6-2/6-3*  
173 were then crossed with GAL4-*Dll* and GAL4-*ptc*. None generated the leg or wing  
174 phenotypes, suggesting that the loss of any individual miRNA was insufficient to affect  
175 the development of leg and wing (Supplementary data S7). As loss-of-function of the  
176 whole cluster has been demonstrated to result in partial larval lethality and the survived  
177 adults possess normal leg phenotype (Bushati et al 2008; Chen et al 2014, this study);  
178 these results indicated that potential compensatory effects of other microRNA families  
179 might involve.

180

181 To understand which target genes are regulated by this microRNA cluster, total RNA  
182 was extracted from the leg discs of third instar larvae of *GAL4-ptc>miR-309-6* and  
183 *GAL4-ptc* (control), and subjected to Illumina Hi-Seq2500 sequencing. Third instar  
184 larvae were chosen as this is the developmental stage in which leg tarsal segments  
185 differentiate (Kojima 2004). Differentially expressed genes are shown in  
186 Supplementary data S8. Expression levels of CG32264 and CG10420 were similar in  
187 both the *GAL4-ptc>miR-309-6* and control, further reducing the possibility that the  
188 phenotypic change was caused by any effect on or of these genes.

189

190 Many of the genes involved in *Drosophila* leg development are known, and many of  
191 these were down-regulated in our transcriptome data (Supplementary data S8).  
192 Quantitative PCR was carried out to validate the gene expression changes in L3 leg  
193 discs of *GAL4-ptc>miR-309-6*, *GAL4-ptc>miR-309-5* and *GAL4-ptc>miR-6-1/6-2/6-*  
194 *3* (Fig. 4A-G). Our data showed that several leg patterning genes (such as *zfh-2*, *Sp1*,  
195 *Egfr*, *dysf*) were significantly down-regulated in mutant leg discs, suggesting repression  
196 of leg developmental genes by components of this microRNA cluster. UAS-RNAi lines  
197 of these down-regulated genes were crossed to *GAL4-ptc* and *GAL4-Dll*, and we found  
198 that *ptc>zfh-2-RNAi*, *Dll>zfh-2-RNAi*, *Dll>Sp1-RNAi*, *Dll>dysf-RNAi*, *ptc>Egfr-*  
199 *RNAi*, *ptc>dpp-RNAi* and *Dll>dpp-RNAi* resulted in tarsal segment deformities  
200 including loss of segment, joint boundaries and claws (Fig. 4H-N). *zfh-2* is a zinc finger  
201 homeodomain-2 transcription factor known to be involved in proximal-distal patterning  
202 of appendages (Guarner et al 2014), while the transcription factors *Sp1* and *dysf* are  
203 regulators of appendage growth and tarsal joint formation in insects (Córdoba and  
204 Estella 2014; Córdoba et al 2016). *Egfr* and *dpp* are also well known to be vital for leg  
205 patterning (Galindo et al 2002). These data indicate that the miR-309-5 and miR-6-



206 1/2/3 sub-clusters target similar ‘leg development’ genes as the whole miR-309-6  
207 cluster.

208

209 To determine if there are other genes affecting leg development, two sets of  
210 differentially expressed genes were screened for further analyses, including 1) genes  
211 with significant expression change between controls and overexpression experiments,  
212 and 2) genes not expressed in the microRNA overexpression experiments but which are  
213 highly expressed in the controls. Twenty-four genes were identified as differentially  
214 expressed including *Arc1*, *Ag5r*, *Ag5r2*, *CG5084*, *CG5506*, *CG6933*, *CG7017*, *CG7252*,  
215 *CG7714*, *CG14300*, *CG17826*, *Eig71Eb*, *Hsp68*, *Hsp70Bb*, *Hsp70Bc*, *Mtk*, *Muc96D*,  
216 *Peritrophin-15a*, *Sgs3*, *Sgs5*, *stv*, *Obp99a*, *obst-I*, and *w* (Supplementary data S8).  
217 Genes that were absent or down-regulated in the *GAL4-ptc>miR-309-6* compared to  
218 controls were further tested by generating *GAL4-ptc* or *Dll >UAS-RNAi* lines for each  
219 gene, to check whether a short leg phenotype was observed. Similarly, *GAL4-ptc* or  
220 *Dll >UAS*-lines were generated for each gene that was upregulated in *GAL4-ptc>miR-*  
221 *309-6*. None of these individual manipulations were found to cause shortening of the  
222 leg or loss of tarsal segments (Supplementary data S9).

223

224 To further explore the genes being controlled by individual members of this miR-309-  
225 6 cluster, we transfected different combinations of the cluster microRNAs into  
226 *Drosophila* S2 cells and sequenced the transcriptomes. There were 178 differentially  
227 expressed genes in total when comparing to the controls (Fig. 5). Among these genes,  
228 113 genes (~63.5%) and 65 genes (~36.5%) are commonly or uniquely regulated by  
229 microRNA cluster members, respectively (Supplementary data S10). Gene ontology  
230 (GO) enrichment analysis was carried out between the gene lists resulting from  
231 transfection of the whole cluster versus the younger members of the cluster (miR-6-

232 1/2/3). There is no clear difference between the processes targeted by the whole cluster  
233 relative to the miR-6-1/2/3 sub-cluster, even in the ‘unique’ target category  
234 (Supplementary data S11).

235

236 A question that has been frequently asked within the field is whether it is crucial and  
237 important for protein coding genes to be regulated by microRNAs. In some views, given  
238 that microRNAs can theoretically bind to hundreds of transcripts (e.g. Bartel 2009;  
239 Betel et al 2010; Reczko et al 2012), it has been proposed that the effect of microRNAs  
240 on targets would be weak and biologically irrelevant. In other views, based on the fact  
241 of sequence and target conservation and that some microRNAs have been found to  
242 strongly repress targets, which can result in phenotypic changes, it has also been argued  
243 that microRNA-protein-coding gene interactions are biologically significant. It is  
244 hypothesized that many microRNAs function to repress target transcription noise and  
245 stabilize gene regulatory networks, or can be important in evolution via such processes  
246 as microRNA arm switching (e.g. Flynt and Lai 2008; Pinzon et al 2017; Zhao et al  
247 2017; Hornstein and Shomron 2006; Peterson et al 2009; Wu et al 2009; Ebert and  
248 Sharp 2012; Posadas and Carthew 2014; Marco et al 2010; Griffiths-Jones et al 2011;  
249 Hui et al 2013). In the *in vitro* and *in vivo* data provided here, expression of a  
250 polycistronic transcript containing eight microRNAs organised in a genomic cluster  
251 (miR-309-6) can result in phenotypic and gene expression changes when the  
252 microRNA expression is altered (Fig. 5 and 6A). Together with the fact that individual  
253 microRNAs alone cannot recapitulate the phenotypes, we conclude that action of the  
254 microRNA cluster as a combinatorial entity is important in gene regulation, and that  
255 future analyses should focus on the cluster and sub-cluster levels rather than on  
256 individual microRNAs alone.

257

258 Another consideration is what the functional consequences of microRNAs being  
259 clustered are. Recently, it was shown that many mammal microRNA clusters may have  
260 multiple starting, end and processing sites, which not always transcribing all encoded  
261 microRNAs (Chang et al 2015; de Rie et al 2017). In *D. melanogaster*, miR-317/277/34  
262 cluster have different primary microRNA isoforms (Zhou et al 2018). The miR-309-6  
263 cluster was reported to be transcribed as a single transcript (Biemar et al 2005), which  
264 was supported by the Flybase RAMPAGE and ModENCODE CAGE data  
265 (Supplementary data S13). In addition, our 5'RACE and RT-PCR also validated the  
266 presence of the primary transcript of miR-309-6 cluster (Supplementary data S13). The  
267 conventional view focuses on the functional significance of shared targets by all  
268 microRNA members in a cluster, because with the regulation via a shared promoter,  
269 these microRNAs need to regulate their targets in the same cell at the same time. Hence,  
270 there is selection on the promoter of a microRNA cluster as members of the microRNA  
271 cluster must cooperatively function together (see introduction, Fig 6B). Our data  
272 support this view. For instance, if mutation occurred in the promoter sequence resulting  
273 in overexpression of this polycistronic transcript, this would then lead to phenotypes  
274 such as the shortening of legs. Such phenotypic changes would then potentially alter  
275 the organism's fitness and be subjected to selection. This then can be viewed as an  
276 evolutionary constraint on the cluster promoter, with selective pressures on the  
277 promoter interacting with selective pressures on the evolution of the microRNA  
278 sequences themselves and the consequent evolution of the target affinities.

279

280 In addition to selection on the temporal and spatial aspects of microRNA cluster  
281 expression, levels of microRNA expression also appear to be functionally important  
282 and hence subject to selection. For example, when expressing only miR-309, miR-3, or  
283 miR-286-4-5, no phenotypic effects were observed, while the summation of expressing

284 all of them (miR-309-5) resulted in phenotypic changes (Fig. 6A). These results suggest  
285 that as cluster composition evolves then selection on the promoter will also change, as  
286 ‘tuning’ of expression levels will likely be required in conjunction with changes to  
287 cluster membership (Fig. 6B). Given that expression of the younger members, miR-6-  
288 1/2/3, also results in similar phenotypes (Fig. 6A), it is likely that new microRNA  
289 members when arising in the microRNA cluster (via *de novo* formation or tandem  
290 duplication), can also enhance the selective pressures acting on the microRNA cluster.  
291 Another possibility is that individual microRNAs of a microRNA cluster can only target  
292 the leg patterning genes weakly, and a phenotype can only result when multiple leg  
293 genes are being targeted by multiple microRNAs in a cumulative manner. Plasticity-  
294 first evolution has been proposed as a predominant mechanism in nature (Levis and  
295 Pfennig 2016), and microRNAs have been postulated as a “missing link” in this process,  
296 by providing fine-tuning of expression networks and facilitating adaptation (Voskarides  
297 2016). The evolution and functions of a microRNA cluster will then be a balance of  
298 sequence mutations on its promoter that control the spatiotemporal aspects and levels  
299 of cluster expression, and the functions of target genes either commonly or uniquely  
300 regulated by microRNAs inside the cluster. MicroRNA clusters must thus be viewed as  
301 integrated composites with both regulation and target affinities co-evolving in a  
302 concerted fashion.

303

## 304 **Methods**

### 305 **Genome-wide target prediction**

306 Mature miRNA sequences were retrieved from the public repository for published  
307 microRNA sequences at the miRBase database (<http://www.mirbase.org>). Eukaryotic 3’  
308 untranslated region (UTR) sequences were retrieved from the public repository for  
309 published mRNA sequences at FlyBase ([ftp://ftp.flybase.net/releases/FB2018\\_01/](ftp://ftp.flybase.net/releases/FB2018_01/)). All

310 mature miRNAs were then used to predict targets in their respective genomes using the  
311 miRanda algorithm (Enright et al 2003) with parameters (i.e. -sc S Set score threshold  
312 to S 140 (from 140 to 772.00); -en -E Set energy threshold to -E kcal/mol (from -78.37  
313 to -5.28); and -strict Demand strict 5' seed pairing). For *D. melanogaster*, target  
314 prediction was also performed by Targetscanfly (Agarwal et al 2018).

315

### 316 **Fly culture, mutant construction, and insertion site checking**

317 To prepare the overexpression constructs of *D. melanogaster* microRNA cluster miR-  
318 309-6 and miR-309-5, the corresponding stem-loop with flanking sequences was  
319 amplified and cloned into the GAL4-inducible vector pUAST (primer information is  
320 provided in Supplementary information S12). Constructs were sequenced prior to  
321 injection into *D. melanogaster* *w<sup>1118</sup>* embryos. Flies were screened and crossed to  
322 generate stable homozygous transformants. Insertion sites of the *UAS-miR-309-6* and  
323 *UAS-miR-309-5* cluster transgene were checked with Splinkerette PCR (Potter and Luo  
324 2010). Various GAL4 drivers, UAS-gene and UAS-RNAi lines were obtained from the  
325 Bloomington *Drosophila* Stock Center (BDSC) (Supplementary information S6). The  
326 miR-309-6 whole cluster deletion line was ordered from BDSC (#58922, Chen et al  
327 2014). UAS-CG32264-RNAi and UAS-CG10420-RNAi were donated by the  
328 Transgenic RNAi Project. UAS-miR-6-1/6-2/6-3, UAS-miR-286, UAS-miR-309 and  
329 UAS-miR-286/4/5 were donated by Stephen Cohen and Eric Lai, and UAS-miR-3 was  
330 obtained from the Zurich ORFeome Project. UAS-microRNA-sponge lines including  
331 miR-3, miR-4, miR-5, miR-6-1/2/3, miR-286 and miR-309 were donated by David Van  
332 Vactor. All flies were maintained on standard yeast-cornmeal-agar medium at 25°C.  
333 Males and virgin females from each fly line were randomly collected for crossings. For  
334 each crossing of GAL4 and UAS fly lines, three random males and three random virgin

335 females were used, and reciprocal crosses were carried out. At least three separate  
336 crossings were performed for each GAL4 and UAS pair.

337

### 338 **MicroRNA expressing vector construction and cell transfection**

339 MicroRNAs were amplified from *D. melanogaster* (primer information shown in  
340 Supplementary information S12). Amplicons were cloned into pAC5.1 vector  
341 (Invitrogen). All constructs were sequenced to confirm their identities. *Drosophila* S2  
342 cells (DRSC) were kept at 23°C in Schneider *Drosophila* medium (Life Technologies)  
343 with 10% (v/v) heat-inactivated fetal bovine serum (Gibco, Life Technologies) and  
344 1:100 Penicillin-Streptomycin (Gibco, Life Technologies). The pAC5.1-miRNA (300  
345 ng) was transfected into *Drosophila* S2 cells using Effectene (Qiagen) per the  
346 manufactures' instructions. RNA was isolated at 48 h post-transfection.

347

### 348 **Transcriptome and small RNA sequencing**

349 RNA was extracted from leg discs of pupariating 3<sup>rd</sup> instar larvae of GAL4-*ptc*>*miR*-  
350 *309-6*, GAL4-*ptc*>*miR*-*309-5*, GAL4-*ptc*>*miR*-*6-1/6-2/6-3* and GAL4-*ptc* (control)  
351 lines, S2 cells expressing different combination of microRNAs in the cluster and S2  
352 (control) cells. Wildtype leg disc RNA was processed by BGI for HiSeq Small RNA  
353 library construction and 50 bp single-end (SE) sequencing. The expressed microRNAs  
354 were quantified by the "quantifier.pl" module of the mirDeep2 package with  
355 parameters "-g 0 -e 0 -f 0", and the clean reads were aligned to hairpin sequence  
356 from miRBase (release 22) by bowtie with parameters "-l 18 -v 0 -a --best --norc --  
357 strata". Transcriptome libraries were constructed using the TruSeq stranded mRNA LT  
358 sample prep kit, and sequenced on an Illumina HiSeq2500 platform (BGI Hong Kong).  
359 Raw reads were filtered using Trimmomatic and mapped to Flybase v.6.14 using

360 Cufflinks (Trapnell et al 2012). Differential gene expression was evaluated using  
361 Cuffdiff.

362

### 363 **Taqman microRNA assays and real-time PCR**

364 Expression of microRNAs was measured via Taqman microRNA assays (Applied  
365 Biosystems™) following the manufactures' instructions. For detection of differential  
366 gene expression, RNAs from the respective crosses were reverse-transcribed into  
367 cDNA using the iScript™ cDNA synthesis Kit (BioRad). Real-time PCR was  
368 conducted in three biological replicates using the CFX96 Touch™ Real-Time PCR  
369 Detection System (BioRad), with a programme of denaturation at 95°C for 3 min  
370 followed by 40 cycles of 95°C/ 10s, 55°C/ 10s and 72°C/ 15s. PCRs were run with half  
371 iTaq™ Universal SYBR® Green Supermix (BioRad) and 0.2 µM of each primer pair  
372 (primer information is listed in Supplementary information S12).

373

374

375

376

377

378

379 **Figures and legends**

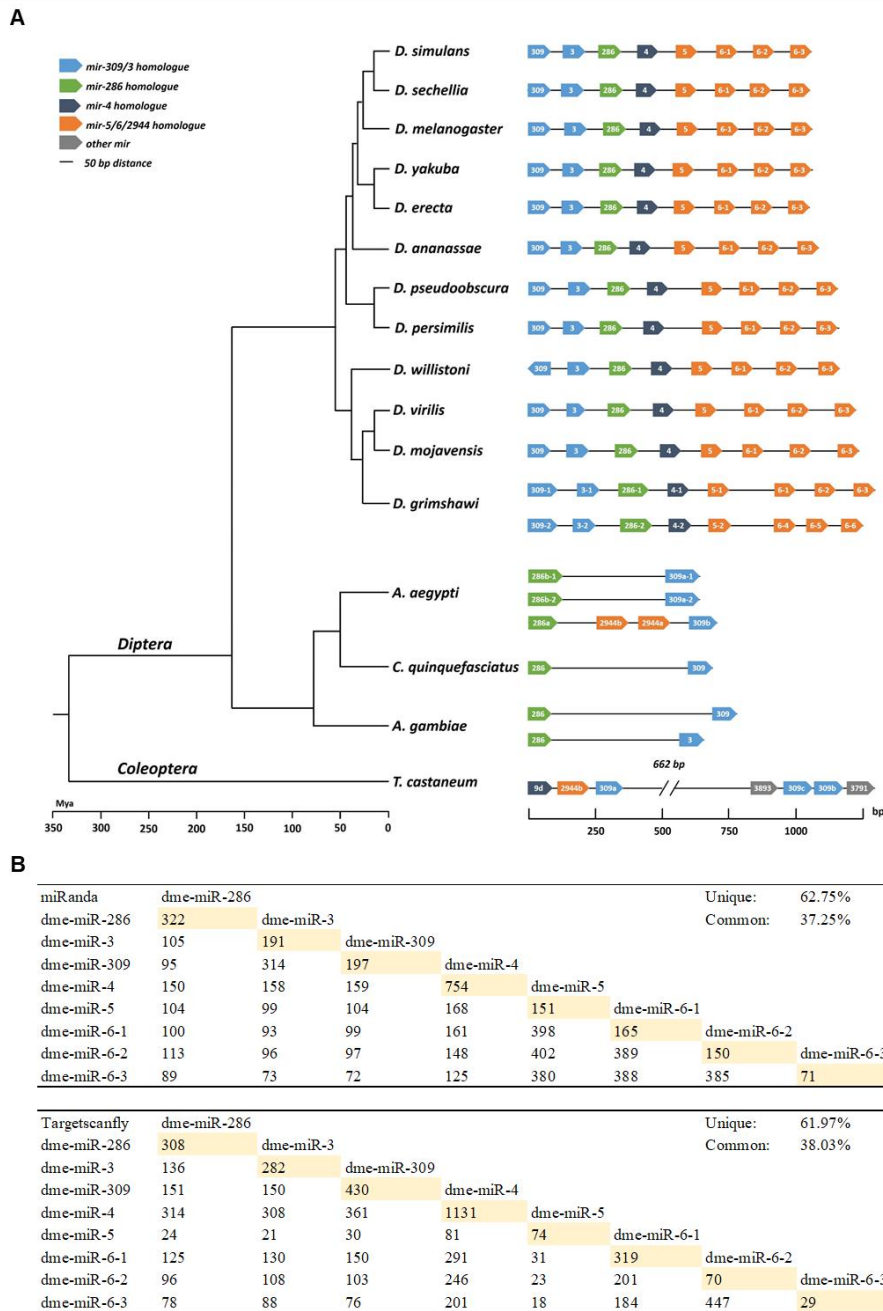

380

381 **Fig. 1 miR-309-6 cluster (miR-6/5/4/286/3/309) in various insects.** A) Genomic

382 organisation of the miR-309-6 cluster in insects (drawn to scale). MicroRNA

383 homologues are shown by the same colour (Mohammed et al 2014; Ninova et al 2014,

384 2016). B) Number of miRanda and targetscafly *in silico*-predicted target genes shared

385 by microRNAs in the cluster in *Drosophila melanogaster*. Unique targets are

386 highlighted in yellow. For other species refer to supplementary data S2.



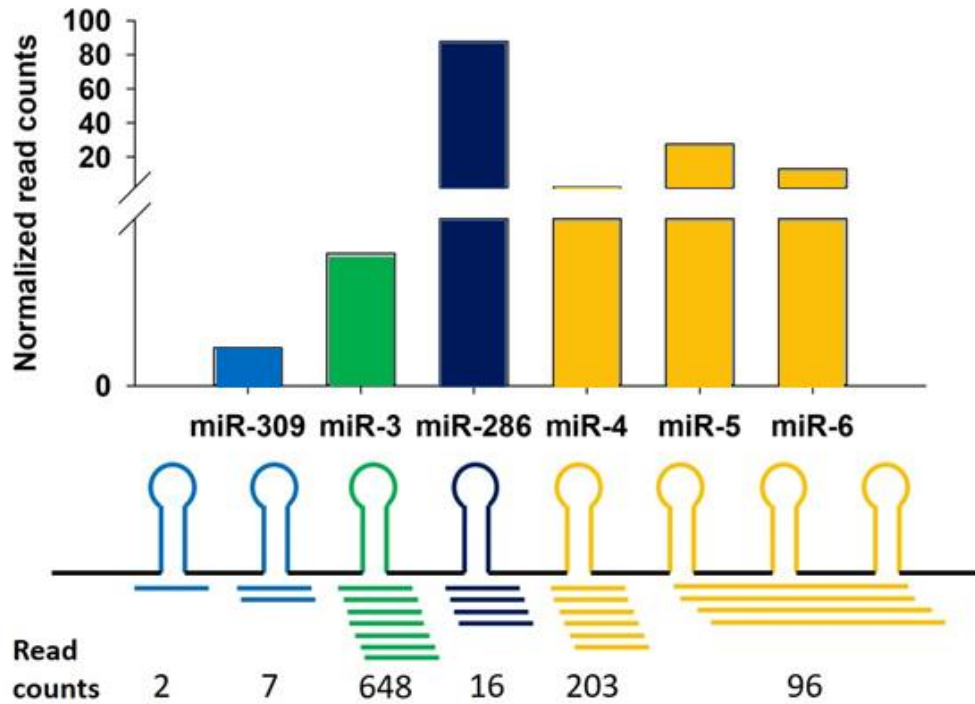

387

388 **Fig. 2 Small RNA sequencing revealed the expression of the miR-309-6 cluster in**

389 *D. melanogaster* L3 larvae leg discs. The clean read counts mapped by bowtie were

390 shown (Upper panel: normalized read counts; lower panel: raw counts).

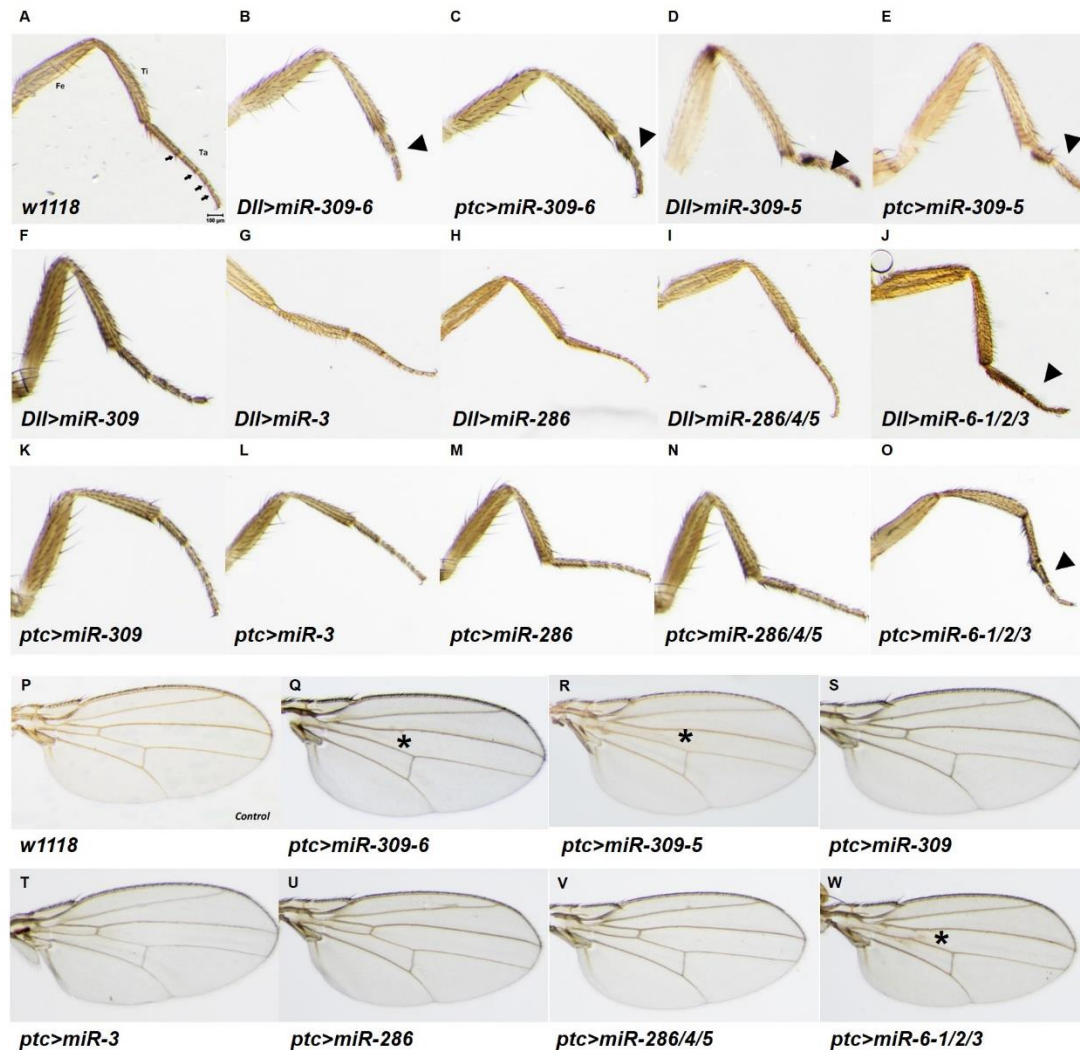

391

392 **Fig. 3 Expression of the whole miR-309-6 cluster, miR-309-5 or miR-6-1/2/3 sub-**  
393 **clusters results in shortening of leg tarsus and loss of anterior cross vein, whereas**  
394 **expression of other microRNAs from the cluster does not cause these phenotypic**  
395 **changes.** Leg pictures of A) w1118 (control), B-E) expression of whole miR-309-6  
396 cluster and miR-309-5 sub-cluster in either the *Distal-less* or *patched* expressing cells,  
397 F-O) expression of microRNAs from the cluster in either the *Distal-less* or *patched*  
398 expressing cells; Wing pictures of P) w1118, Q-W) expression of whole miR-309-6  
399 cluster, miR-309-5 partial cluster, miR-6-1/2/3 partial cluster, or individual microRNAs  
400 in *patched* expressing cells. Abbreviations: Fe: femur; Ti: tibia; Ta: tarsus; Arrowhead  
401 indicates shortened tarsal segments; star indicates the loss of anterior wing vein.

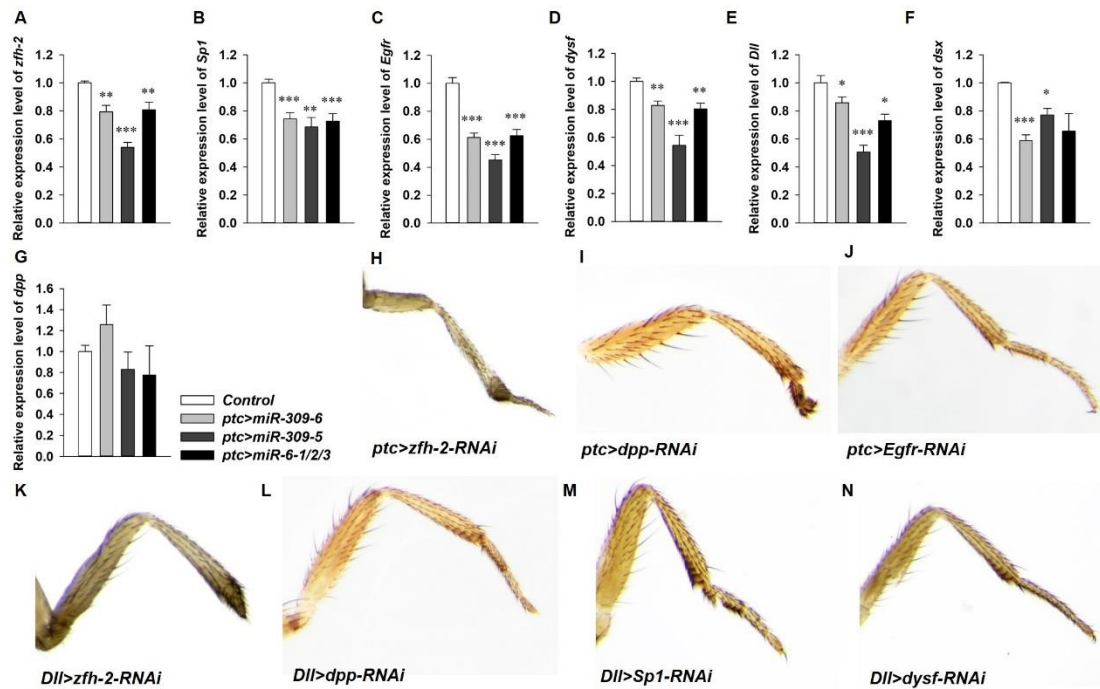

402

403 **Fig. 4 Expression of whole miR-309-6 cluster, or miR-309-5 and miR-6-1/2/3 sub-**

404 **clusters regulates similar gene regulatory networks of leg development. A-G)**

405 Relative expression levels of *zfh-2*, *Sp1*, *Egfr*, *dysf*, *Dll*, *dsx* and *dpp* in leg discs of

406 *ptc>miR-309-6*, *ptc>miR-309-5* and *ptc>miR-6-1/2/3*. Values represent mean  $\pm$  S.E.M,

407 \*  $p < 0.05$ , \*\*  $p < 0.005$  and \*\*\*  $p < 0.001$ . H-J) Aberrant tarsal leg phenotypes created by

408 *ptc* GAL4 driven expression of *zfh-2-RNAi*, *dpp-RNAi* and *Egfr-RNAi*. K-N) Tarsal

409 leg deformities created by *Dll* GAL4-driven expression of *zfh-2-RNAi*, *dpp-RNAi*,

410 *Sp1-RNAi* and *dysf-RNAi*.

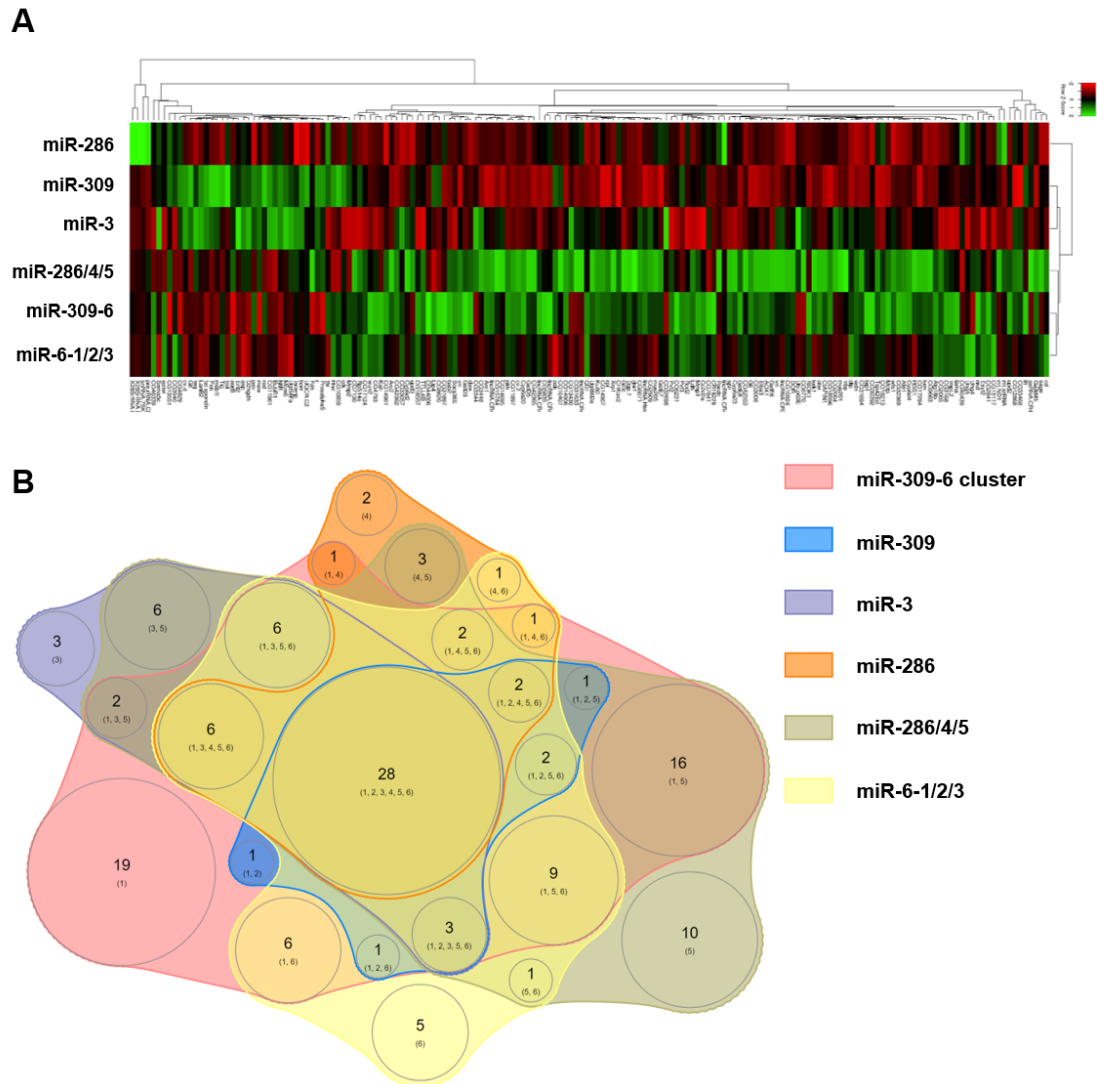

411

412

413 **Fig. 5 Cell transfection assays reveal common and unique targets of microRNAs**

414 **in the miR-309-6 cluster.** A) Transcriptome analyses of differential gene expression

415 after transfection of different combinations of microRNAs from the cluster into

416 *Drosophila* S2 cells. B) Venn-diagram showing the genes commonly or uniquely

417 regulated by different combinations of microRNAs in the cluster. Numbers shown

418 within the circles represent the genes being regulated by the relevant microRNA cluster

419 members. Details of the gene list and their expression compared to the controls are

420 listed in Supplementary data S10.

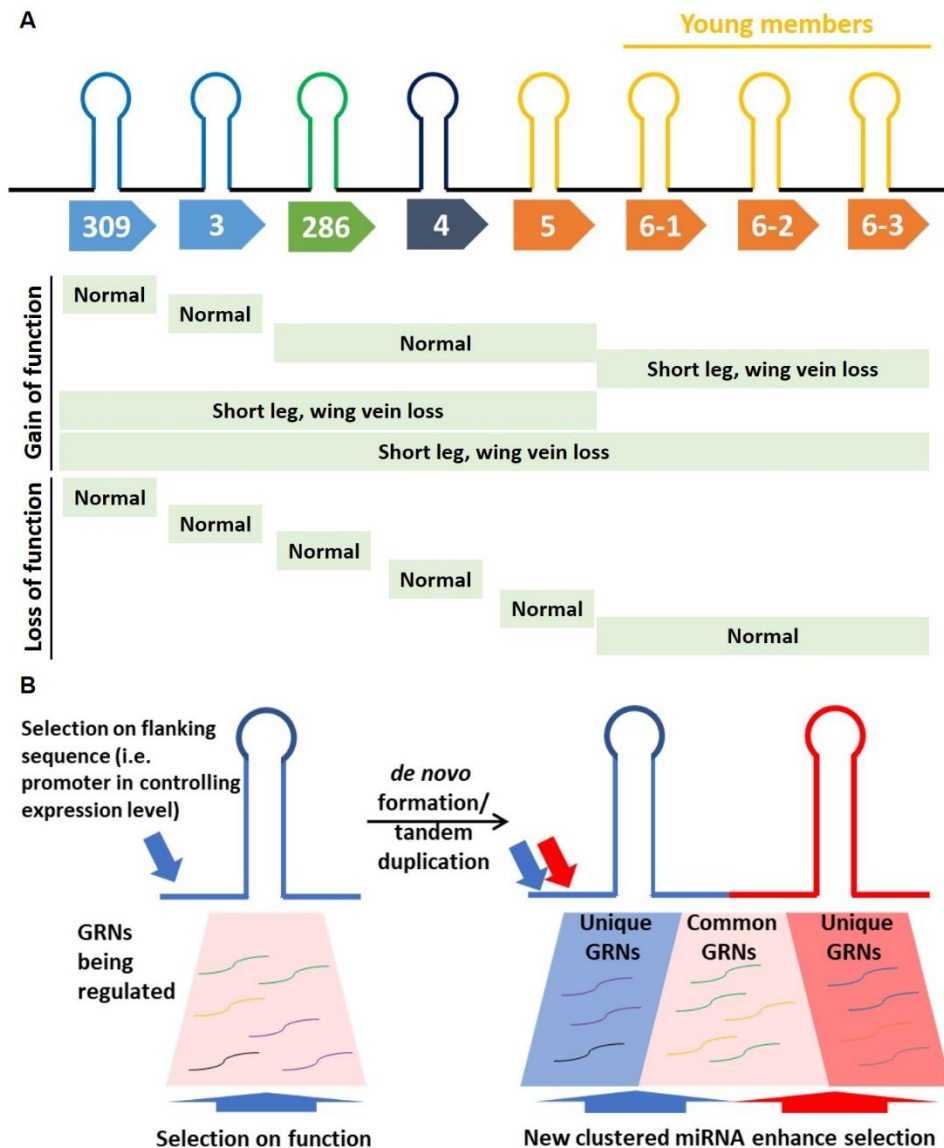

421

422 **Fig. 6 Varying selection forces acting via new and old microRNAs in a genomic**

423 **cluster.** A) Summary of the phenotypic results obtained in the gain-of-function and

424 loss-of-function experiments of miR-309-6 cluster microRNAs in adult *Drosophila*

425 *melanogaster*. Green colour depicts the GAL4/UAS mutants. B) During the formation

426 of new microRNAs in a genomic cluster, selection forces are reinforced and potentially

427 extended via the extension of the range of unique targets. For details, please refer to

428 main text. The same colour denotes mRNAs involved in the same gene regulatory

429 network (GRN). The arrows represent the selection forces acting on both the promoter

430 sequence and microRNA sequences in an integrated fashion.

431 **Supplementary data / information**

432 S1. Sequence alignment of microRNAs in miR-309-6 cluster.

433 S2. Target gene prediction of different microRNAs in microRNA-309-6 cluster of  
434 different *Drosophila* genomes.

435 S3. Expression of miR-309-6 cluster microRNAs in *D. melanogaster*.

436 S4. Tarsal segments of *Dll* and *ptc* GAL4-driven expression of miR-309-6, miR-309-5  
437 and miR-6-1/2/3.

438 S5. Tarsal segment numbers of *Dll* and *ptc* GAL4-driven expression of miR-309-6,  
439 miR-309-5 and miR-6-1/2/3 mutants.

440 S6. UAS-gene and UAS-RNAi fly lines used in this study.

441 S7. Leg and wing pictures of loss-of-function of individual microRNAs from the miR-  
442 309-6 cluster in either the *Distal-less* (A-F) or *patched* (G-R) expressing cells.

443 S8. Differential expression of genes with over 2-fold changes and leg patterning related  
444 genes between GAL4-*ptc*>miR-309-6 (mutant) and control (GAL4-*ptc*) leg discs.

445 S9. Phenotypes of gain- and loss- of-function of selected differentially expressed genes.

446 S10. List of genes being regulated by microRNA cluster members *in vitro*.

447 S11. Gene Ontology (GO) enrichment analysis

448 S12. Primer information used in this study.

449 S13. Evidences showing the polycistronic transcript of miR-309-6 cluster. **Author**

450 **Contributions**

451 JHLH conceived and supervised the study. ZQ, WCY, HYY, CWCY, WN, AYPW,

452 IHTL, JHLH carried out the experimental works. NWWYW cloned the cluster into

453 pUAST vector. FKMC obtained homozygous red-eye lines after pUAST vector

454 injection by BestGene. ZQ, WCY, HYY, CWCW, WN, AYPW, IHTL, FKMC, TFC,

455 KFL, SZ, KHC, DEKF, WGB, JHLH wrote the manuscript.

456

457 **Acknowledgements**

458 The authors thank KB Wong and HM Lam for discussion. This research was supported  
459 by the Hong Kong Research Grant Council GRF Grant (14103516), The Chinese  
460 University of Hong Kong Direct Grant (4053248), and TUYF Charitable Trust  
461 (6903957) (JHLH).

462

463 **Competing interests**

464 The authors declare no conflict of interests.

465

466 **References**

467 Agarwal, V; Subtelny, AO; Thiru, P; Ulitsky, I; Bartel, DP. Predicting microRNA  
468 targeting efficacy in *Drosophila*. *Genome biology*. 2018. 19, 152.

469

470 Altuvia, Y; Landgraf, P; Lithwick, G; Elefant, N; Pfeffer, S; Aravin, A; Brownstein, MJ;  
471 Tuschl, T; Margalit, H. Clustering and conservation patterns of human microRNAs.  
472 *NUCLEIC ACIDS RESEARCH*. 2005. 33(8), 2697-2706.

473

474 Bartel, DP. MicroRNAs: Target recognition and regulatory functions. *CELL*. 2009.  
475 136(2), 215-233.

476

477 Bartel DP. Metazoan MicroRNAs. *Cell*. 2018. 173(1), 20-51.

478

479 Betel, D; Koppal, A; Agius, P; Sander, C; Leslie, C. Comprehensive modeling of  
480 microRNA targets predicts functional non-conserved and non-canonical  
481 sites. *GENOME BIOLOGY*. 2010. 11(8), R90.

482



483 Biemar, F; Zinzen, R; Ronshaugen, M; Sementchenko, V; Manak, JR; Levine, MS.  
484 Spatial regulation of microRNA gene expression in the *Drosophila* embryo.  
485 PROCEEDINGS OF THE NATIONAL ACADEMY OF SCIENCES OF THE  
486 UNITED STATES OF AMERICA. 2005. 102(44), 15907-15911.

487

488 Bushati, N; Stark, A; Brennecke, J; Cohen, SM. Temporal reciprocity of miRNAs and  
489 their targets during the maternal-to-zygotic transition in *Drosophila*. CURRENT  
490 BIOLOGY. 2008. 18(7), 501-506.

491

492 Casares, F; Mann, RS. The ground state of the ventral appendage in *Drosophila*.  
493 SCIENCE. 2001. 293(5534), 1477-1480.

494

495 Chang T-C; Perteau M; Lee S; Salzberg SL; Mendell JT. Genome-wide annotation of  
496 microRNA primary transcript structures reveals novel regulatory mechanisms. Genome  
497 Res. 2015. 25:1401–1409.

498

499 Córdoba, S; Estella, C. The bHLH-PAS Transcription Factor Dysfusion Regulates  
500 Tarsal Joint Formation in Response to Notch Activity during *Drosophila* Leg  
501 Development. PLoS genetics. 2014. 10, e1004621.

502

503 Córdoba, S; Requena, D; Jory, A; Saiz, A; Estella, C. The evolutionarily conserved  
504 transcription factor Sp1 controls appendage growth through Notch signaling.  
505 Development. 2016. 143, 3623-3631.

506

507 Chen, YW; Song, S; Weng, R; Verma, P; Kugler, JM; Buescher, M; Rouam, S; Cohen,  
508 SM. Systematic study of *Drosophila* microRNA functions using a collection of targeted



509 knockout mutations. *DEVELOPMENTAL CELL*. 2014. 31(6), 784-800.

510

511 Dambal, S; Shah, M; Mihelich, B; Nonn, L. The microRNA-183 cluster: the family that  
512 plays together stays together *NUCLEIC ACIDS RESEARCH*. 2015. 43(15), 7173-  
513 7188.

514

515 de Rie D; Abugessaisa I; Alam T; Arner E; Arner P; Ashoor H; Åström G; Babina M;  
516 Bertin N; Burroughs AM; et al. An integrated expression atlas of miRNAs and their  
517 promoters in human and mouse. *Nat. Biotechnol.* 2017. 35:872–878.

518

519 Deschamps, J; Duboule, D. Embryonic timing, axial stem cells, chromatin dynamics,  
520 and the Hox clock. *GENES & DEVELOPMENT*. 2017. 31(14), 1406-1416.

521

522 Doron, S; Melamed, S; Ofir, G; Leavitt, A; Lopatina, A; Keren, M; Amitai, G; Sorek,  
523 R. Systematic discovery of antiphage defense systems in the microbial pangenome.  
524 *SCIENCE*. 2018. 359(6379), eaar4120.

525

526 Ebert, MS; Sharp, PA. Roles for microRNAs in conferring robustness to biological  
527 processes. *CELL*, 2012. 149(3), 515-524.

528

529 Flynt, AS; Lai, EC. Biological principles of microRNA-mediated regulation: shared  
530 themes amid diversity. *NATURE REVIEWS GENETICS*. 2008. 9(1), 831-842.

531

532 Fromm, B; Billipp, T; Peck, LE; Johansen, M; Tarver, JE; King, BL; Newcomb, JM;  
533 Sempere, LF; Flatmark, K; Hovig, E; Peterson, KJ Bassler, BL. A uniform system  
534 for the annotation of vertebrate microRNA genes and the evolution of the human

535 microRNAome. Annual Review of Genetics. 2015. 49.  
536  
537 Galindo, MI; Bishop, SA; Greig, S; Couso, JP. Leg Patterning Driven by Proximal-  
538 Distal Interactions and EGFR Signaling. Science 2002. 297, 256-259.  
539  
540 Griffiths-Jones, S; Hui, JHL; Marco, A; Ronshaugen, M. MicroRNA evolution by arm  
541 switching. EMBO REPORTS. 2011. 12(2), 172-177.  
542  
543 Guarner, A.; Manjón, C.; Edwards, K.; Steller, H.; Suzanne, M.; Sánchez-Herrero, E.  
544 The zinc finger homeodomain-2 gene of *Drosophila* controls Notch targets and  
545 regulates apoptosis in the tarsal segments. Developmental Biology 2014. 385, 350-365.  
546  
547 Hausser, J; Zavolan, M. Identification and consequences of miRNA-target interactions  
548 - beyond repression of gene expression. NATURE REVIEWS GENETICS. 2014. 15(9),  
549 599-612.  
550  
551 Hornstein, E; Shomron, N. Canalization of development by microRNAs. NATURE  
552 GENETICS. 2006. 38(6), S20-S24.  
553  
554 Hui, JHL; Marco, A; Hunt, S; Melling, J; Griffiths-Jones, S; Ronshaugen, M. Structure,  
555 evolution and function of the bi-directionally transcribed iab-4/iab-8 microRNA locus  
556 in arthropods. NUCLEIC ACIDS RESEARCH. 2013. 41(5), 3352-  
557 3361.  
558  
559 Kim, VN; Nam, JW. Genomics of microRNA. TRENDS IN GENETICS. 2006. 22(3),  
560 165-173.

561

562 Kim, YK; Yu, J; Han, TS; Park, SY; Namkoong, B; Kim, DH; Hur, K; Yoo, MW; Lee,  
563 HJ; Yang, HK; Kim, VN. Functional links between clustered microRNAs: suppression  
564 of cell-cycle inhibitors by microRNA clusters in gastric cancer. NUCLEIC ACIDS  
565 RESEARCH. 2009. 37(5), 1672-1681.

566

567 Kojima, T. The mechanism of Drosophila leg development along the proximodistal  
568 axis. DEVELOPMENT GROWTH & DIFFERENTIATION. 2004. 46(2), 115-129.

569

570 Kozomara, A; Griffiths-Jones, S. miRBase: annotating high confidence microRNAs  
571 using deep sequencing data NUCLEIC ACIDS RESEARCH. 2014. 42(D1), D68-  
572 73.

573

574 Lagos-Quintana, M; Rauhut, R; Lendeckel, W; Tuschl, T. Identification of novel genes  
575 coding for small expressed RNAs. SCIENCE. 2001. 294(5543), 853-858.

576

577 Levis, NA; Pfennig, DW. Evaluating 'Plasticity-First' evolution in nature: key criteria  
578 and empirical approaches. TRENDS IN ECOLOGY & EVOLUTION. 2016. 31(7),  
579 563-574.

580

581 Marco, A. Response to comment on “microRNAs in the same clusters evolve to  
582 coordinately regulate functionally related genes”. MOLECULAR BIOLOGY AND  
583 EVOLUTION. 2019. 36(8), 1843.

584

585 Marco, A; Hui, JHL; Ronshaugen, M; Griffiths-Jones, S. Functional shifts in insect  
586 microRNA evolution. GENOME BIOLOGY AND EVOLUTION. 2010. 2, 686-

587 696.

588

589 Marco, A; Ninova, M; Ronshaugen, M; Griffiths-Jones, S. Clusters of microRNAs  
590 emerge by new hairpins in existing transcripts. NUCLEIC ACIDS RESEARCH. 2013.  
591 41(16), 7745-7752.

592

593 Mohammed, J; Siepel, A; Lai, EC. Diverse modes of evolutionary emergence and flux  
594 of conserved microRNA clusters RNA. 2014. 20(12), 1850-  
595 1863.

596

597 Ninova, M; Ronshaugen, M; Griffiths-Jones, S. Fast-evolving microRNAs are highly  
598 expressed in the early embryo of *Drosophila virilis*. RNA. 2014. 20(3), 360-372.

599

600 Ninova, M., Ronshaugen, M; Griffiths-Jones, S. MicroRNA evolution, expression, and  
601 function during short germband development in *Tribolium castaneum*. Genome  
602 Research. 2016. 26, 85-96.

603

604 Nojima, M; Matsui, T; Tamori, A; Kubo, S; Shirabe, K; Kimura, K; Shimada, M;  
605 Utsunomiya, T; Kondo, Y; Iio, E; Naito, Y; Ochiya, T; Tanaka, Y. Global, cancer-  
606 specific microRNA cluster hypomethylation was functionally associated with the  
607 development of non-B non-C hepatocellular carcinoma. MOLECULAR CANCER.  
608 2016. 15, 31.

609

610 Peterson, KJ; Dietrich, MR; McPeck, MA. MicroRNAs and metazoan macroevolution:  
611 insights into canalization, complexity, and the Cambrian explosion. BIOESSAYS.  
612 2009. 31 (7), 736-747.

613

614 Pinzon, N; Li, B; Martinez, L; Sergeeva, A; Presumey, J; Apparailly, F; Seitz, H.

615 microRNA target prediction programs predict many false positives. GENOME

616 RESEARCH. 2017. 27(2), 234-245.

617

618 Posadas, DM; Carthew, RW. MicroRNAs and their roles in developmental

619 canalization CURRENT OPINION IN GENETICS & DEVELOPMENT. 2014. 27(1),

620 6.

621

622 Potter, CJ; Luo, LQ. Splinkerette PCR for Mapping transposable elements in

623 Drosophila. PLOS ONE. 2010. 5(4), e10168.

624

625 Qu, Z; Bendena, WG; Nong, WY; Siggens, KW; Noriega, FG; Kai, ZP; Zang, YY; Koon,

626 AC; Chan, HYE; Chan, TF; Chu, KH; Lam, HM; Akam, M; Tobe, SS; Hui, JHL.

627 MicroRNAs regulate the sesquiterpenoid hormonal pathway in Drosophila and other

628 arthropods. PROCEEDINGS OF THE ROYAL SOCIETY B-BIOLOGICAL

629 SCIENCES. 2017. 284, 1869.

630

631 Reczko, M; Maragkakis, M; Alexiou, P; Grosse, I; Hatzigeorgiou, AG. Functional

632 microRNA targets in protein coding sequences. BIOINFORMATICS. 2012. 28(6),

633 771-776.

634

635 Tanzer, A; Stadler, PF. Molecular evolution of a microRNA cluster. JOURNAL OF

636 MOLECULAR BIOLOGY. 2004. 339(2), 327-335.

637

638 Trapnell, C; Roberts, A; Goff, L; Pertea, G; Kim, D; Kelley, DR; Pimentel, H; Salzberg,

639 SL; Rinn, JL; Pachter, L. Differential gene and transcript expression analysis of RNA-  
640 seq experiments with TopHat and Cufflinks NATURE PROTOCOLS. 2012. 7(3), 562-  
641 578.

642

643 Ventura, A; Young, AG; Winslow, MM; Lintault, L; Meissner, A; Erkeland, SJ;  
644 Newman, J; Bronson, RT; Crowley, D; Stone, JR; Jaenisch, R; Sharp, PA; Jacks, T.  
645 Targeted deletion reveals essential and overlapping functions of the miR-17 similar to  
646 92 family of miRNA clusters. CELL. 2008. 132(5), 875-886.

647

648 Voskarides K. 'Plasticity-First' evolution and the role of miRNAs: A comment on Levis  
649 and Pfennig. Trends Ecol Evol. 2016. 31(11), 816-817.

650

651 Wang, J; Haubrock, M; Cao, KM; Hua, X; Zhang, CY; Wingender, E; Li, J. Regulatory  
652 coordination of clustered microRNAs based on microRNA-transcription factor  
653 regulatory network. BMC SYSTEMS BIOLOGY. 2011. 5, 199.

654

655 Wang, Y; Luo, JJ; Zhang, H; Lu, J. microRNAs in the same clusters evolve to  
656 coordinately regulate functionally related genes. MOLECULAR BIOLOGY AND  
657 EVOLUTION. 2016. 33(9), 2232-2247.

658

659 Wang, Y; Zhang, H; Lu, J. Response to comment on “microRNAs in the same clusters  
660 evolve to coordinately regulate functionally related genes”. MOLECULAR  
661 BIOLOGY AND EVOLUTION. 2019. 36(8), 1844-1845.

662

663 Wu, CI; Shen, Y; Tang, T. Evolution under canalization and the dual roles of  
664 microRNAs-A hypothesis. GENOME RESEARCH. 2009. 19(5), 734-743.

665

666 Yuan, XY; Liu, CN; Yang, PC; He, SM; Liao, Q; Kang, SL; Zhao, Y. Clustered  
667 microRNAs' coordination in regulating protein-protein interaction network. BMC  
668 SYSTEMS BIOLOGY. 2009. 3, 65.

669

670 Zhao, YX; Shen, X; Tang, T; Wu, CI. Weak regulation of many targets is cumulatively  
671 powerful - An evolutionary perspective on microRNA functionality. MOLECULAR  
672 BIOLOGY AND EVOLUTION. 2017. 34(12), 3041-3046.

673

674 Zhou, L; Lim, M.Y.T; Kaur, P; Saj, A; Bortolamiol-Becet, D; Gopal, V; Tolwinski, N;  
675 Tucker-Kellogg, G; Okamura, K. Importance of miRNA stability and alternative  
676 primary miRNA isoforms in gene regulation during *Drosophila* development. eLife.  
677 2018. 7, e38389.
